# Supplementary material for: Arsenic Trioxide and Venetoclax Synergize against AML Progenitors by ROS Induction and Inhibition of Nrf2 Activation
Source: MDPI journal article supplement (doi:10.3390/ijms23126568), 2022-06-12
Supplement: s1 [file s1]

## **SUPPLEMENTAL INFORMATION**

### **1> Supplemental Figure S1 & Figure Legend for Supplemental Figure S1 (Page**

2) Synergistic effects of ATO and VEN on cell viability in AML blasts.

### **2> Supplemental Tables (Page 3 to Page 7)**

**+ Supplemental Table S1.** Patient characteristics of primary AML samples

**+ Supplemental Table S2.** Primer sequences used for qPCR analysis

**+ Supplemental Table S3.** Target sequences of siRNAs

**+ Supplemental Table S4.** List of antibodies used for IF, IP and IB analysis

# SUPPLEMENTAL FIGURE S1 & FIGURE LEGEND FOR SUPPLEMENTAL FIGURE S1

**Figure S1. Effect of VEN plus ATO combinatorial treatment on growth of primary CD34+CD38– AML progenitor cells in vitro.** Cells were treated for 48 h with control vehicle, individual drugs or with the 2-drug combination at constant drug ratios, on the basis of previously established IC<sub>50</sub> values, followed by measurement of cell proliferation. Drug synergy was analyzed using the CalcuSyn program and is shown in Figure 3F (isobologram).

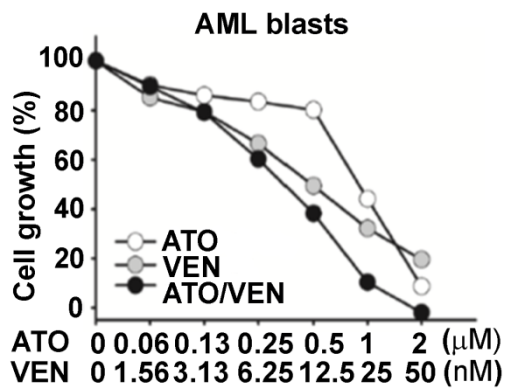

## SUPPLEMENTAL TABLES

**Table S1. Patient characteristics of primary AML samples**

| Sample ID                               | Sample Type | Disease Status    | Response | Cytogenetic | Gene Mutation                               | WBC  | Blasts in PB | Blasts in BM |
|-----------------------------------------|-------------|-------------------|----------|-------------|---------------------------------------------|------|--------------|--------------|
| AML pool samples                        |             |                   |          |             |                                             |      |              |              |
| AML001                                  | PB          | Untreated         | N/A      | Normal      | FLT-3 ITD Pos.,<br>NPM1 Neg.,<br>CEBPA Pos. | 76.8 | 84           | 75           |
| AML002                                  | BM          | Induction Failure | N/A      | Normal      | FLT-3 ITD Pos.,<br>NPM1 Pos.                | 4.2  | 91           | 90           |
| AML003                                  | PB          | Untreated         | N/A      | Normal      | FLT-3 Neg., NPM1 Pos.                       | 5.7  | 72           |              |
| AML004                                  | PB          | Untreated         | N/A      | Normal      | FLT-3 Neg., NPM1 Neg.                       | 29.0 | 91           |              |
| AML005                                  | PB          | Untreated         | N/A      | Normal      | FLT-3 Neg., NPM1 Neg.                       | 12.6 | 69           |              |
| VEN-sensitive and VEN-resistant samples |             |                   |          |             |                                             |      |              |              |
| AMLS01                                  | BM          | New               | CR       | Stemline:   | TP53;U2AF1;ASXL                             | 89.4 | 6            | 73           |

|        |    |                  |            |                                                                                                                  |                         |      |    |      |
|--------|----|------------------|------------|------------------------------------------------------------------------------------------------------------------|-------------------------|------|----|------|
|        |    | diagnosis        |            | 46,XY,del(17)(p11.2)[16]<br><br>Constitutional Cell Line: 46,XY[4]<br><br>FISH:<br><br>Positive for loss of TP53 | 1;RUNX1;FLT3 (ITD)      |      |    |      |
| AMLS02 | BM | New diagnosis    | CR         | 46,XX[20]<br><br>FISH:<br><br>No assay-specific abnormalities detected                                           | DNMT3A;NPM1;TE T2       | 22.1 |    | 2    |
| AMLS03 | BM | New diagnosis    | CR         | Normal                                                                                                           | SF3B1, NPM1, NRAS       | 12.6 |    | 20   |
| AMLR01 | PB | Progressing/high | Refractory | FISH:<br><br>No assay-specific                                                                                   | Inv 3, FLT3 TKD, PTPN11 | 98.6 | 89 | 79.6 |

|        |    | grade                      |            | abnormalities<br>detected                                                                                                                                                                                    |          |      |    |    |
|--------|----|----------------------------|------------|--------------------------------------------------------------------------------------------------------------------------------------------------------------------------------------------------------------|----------|------|----|----|
| AMLR02 | PB | Progressing/<br>high grade | Refractory |                                                                                                                                                                                                              | FLT3-ITD | 58.9 | 69 |    |
| AMLR03 | BM | Progressing/<br>high grade | Refractory | <p>Stemline: 46,XY,t(9;11)(p21.3;q23.3)[3]</p> <p>Sideline 1: 49,sl,+der(9)t(9;11),+20,+21[12]</p> <p>Sideline 2: 51,sdl1,+3,+21[5]</p> <p>FISH:</p> <p>Positive for KMT2A rearrangement with or without</p> |          | 0.8  | 75 | 72 |

|  |  |  |  |                                  |  |  |  |  |
|--|--|--|--|----------------------------------|--|--|--|--|
|  |  |  |  | concurrent<br>gain of<br>3'KMT2A |  |  |  |  |
|--|--|--|--|----------------------------------|--|--|--|--|

**Table S2. Primer sequences used for qPCR analysis**

| No | Primer name | Sequence                              |
|----|-------------|---------------------------------------|
| 1  | NQO-1-F     | <b>5' GCCGCAGACCTTGTGATATT 3'</b>     |
| 2  | NQO-1-R     | <b>5' TTTCAGAATGGCAGGGACTC 3'</b>     |
| 3  | HO-1-F      | <b>5' ATGGCCTCCCTGTACCACATC 3'</b>    |
| 4  | HO-1-R      | <b>5' TGTTGCGCTCAATCTCCTCCT 3'</b>    |
| 5  | GAPDH-F     | <b>5' CCCCTTCATTGACCTCAACTACAT 3'</b> |
| 6  | GAPDH-R     | <b>5' CGCTCCTGGAAGATGGTGA 3'</b>      |

**Table S3. Target sequences of siRNAs**

| No | Name   | Target Sequence                                                                                                      |
|----|--------|----------------------------------------------------------------------------------------------------------------------|
| 1  | siAKT  | <b>CAUCACACCACCUGACCAA</b><br><b>ACAAGGACGGGCACAUUAA</b><br><b>CAAGGGCACUUUCGGCAAG</b><br><b>UCACAGCCCUGAAGUACUC</b> |
| 2  | siNrf2 | <b>GCAUGCUACGUGAUGAAGA</b><br><b>CUCCUACUGUGAUGUGAAA</b><br><b>GUGUCAGUAUGUUGAAUCA</b>                               |

**Table S4. List of antibodies used for IF, IP and IB analysis**

| No | Antibody name               | Information                          |
|----|-----------------------------|--------------------------------------|
| 1  | Anti-Tubulin antibody       | Clone# B-7, Cat# sc-5286, Santa Cruz |
| 2  | Anti-Actin antibody         | Clone# C4, Cat# sc-47778, Santa Cruz |
| 3  | Anti-p-AKT(Ser473) antibody | Cat# 9271, Cell Signaling            |
| 4  | Anti-PARP antibody          | Cat# 9542, Cell Signaling            |
| 5  | Anti-AKT antibody           | Cat# 9272, Cell Signaling            |
| 6  | Anti-Nrf2 antibody          | Cat# 137550, Abcam                   |
| 7  | Anti-Keap1 antibody         | Cat# SAB2501696, Sigma               |
| 8  | Anti-Ubiquitin antibody     | Cat# 07-375, Millipore               |
